# Supplementary material
Source: Springer Nature journal article supplement (https://www.springermedizin.de/resource/supplementary/12950_2011_234_MOESM1_ESM.pdf/9558264)

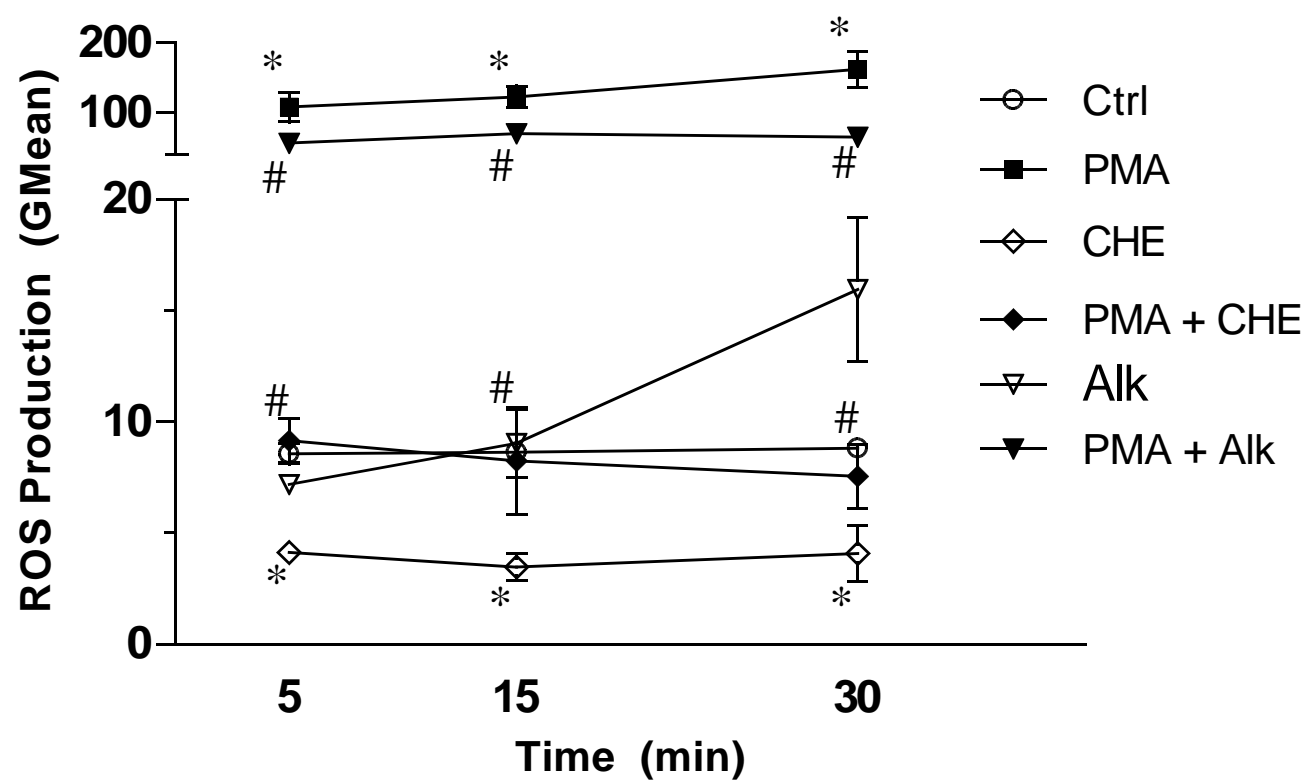

Supplement: MOESM1 [file 9558264]
